# Supplementary material
Source: publisher figshare collection journal article supplement (https://acs.figshare.com/ndownloader/files/31526647)
Supplement: Supplementary file 1 [file 31526647]

# Controlled hydrolysis of nickel-ammonia complex on Pt nanoparticles for the preparation of highly active and stable PtNi/C catalysts

*Hao Wu<sup>a</sup>, Huichi Zhong<sup>a</sup>, Yingzhi Pan<sup>a</sup>, Huibin Li<sup>a</sup>, Jianhuang Zeng<sup>a, b, \*</sup>*

<sup>a</sup>School of Chemistry and Chemical Engineering, South China University of Technology; Guangdong Key Lab for Fuel Cell Technology, Guangzhou 510641, China

<sup>b</sup>Sino-Science Hydrogen Co. Ltd., Guangzhou 511458, China.

\*Corresponding author, [cejhzeng@scut.edu.cn](mailto:cejhzeng@scut.edu.cn) (J.H. Zeng)

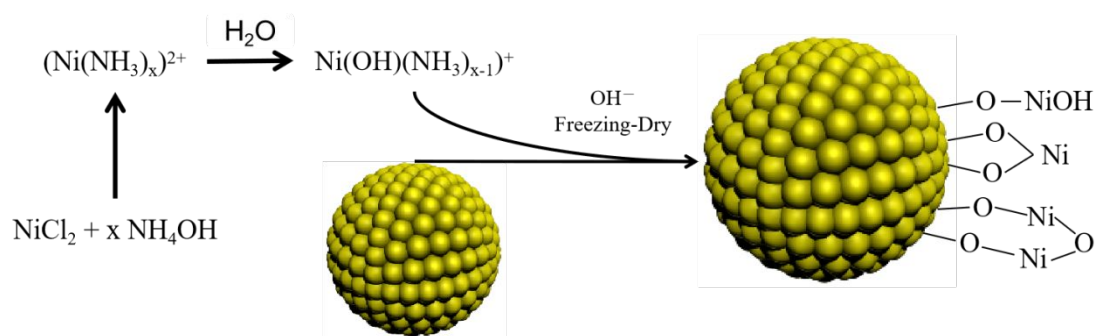

Scheme S1. Schematic diagram of the mechanism on the controlled hydrolysis of nickel-ammonia complex on Pt nanoparticles

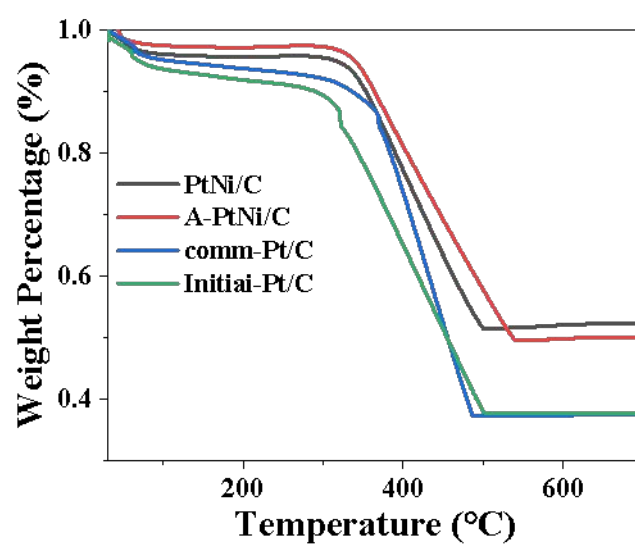

Figure S1. Thermogravimetric analysis (TGA) of the catalysts

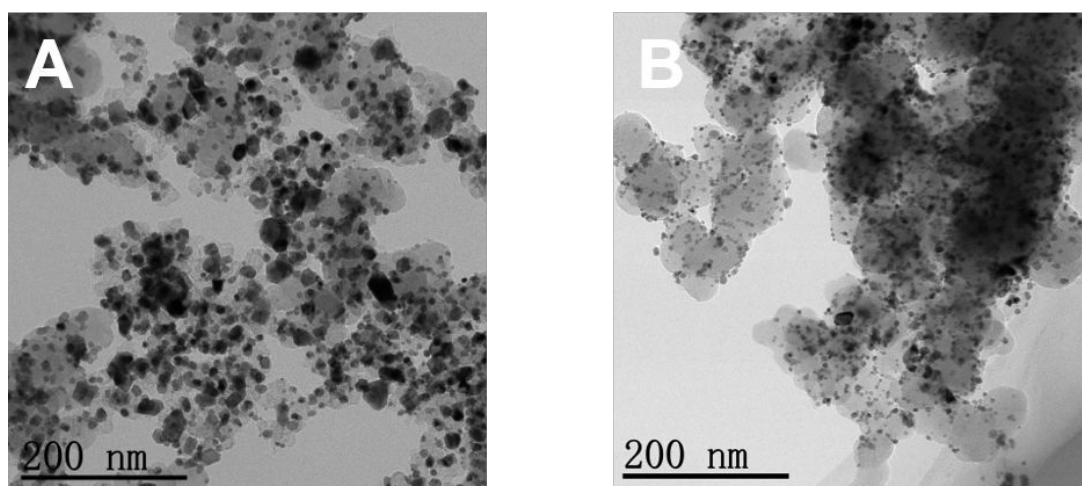

Figure S2. TEM images of PtNi/C (A) and A-PtNi/C (B)

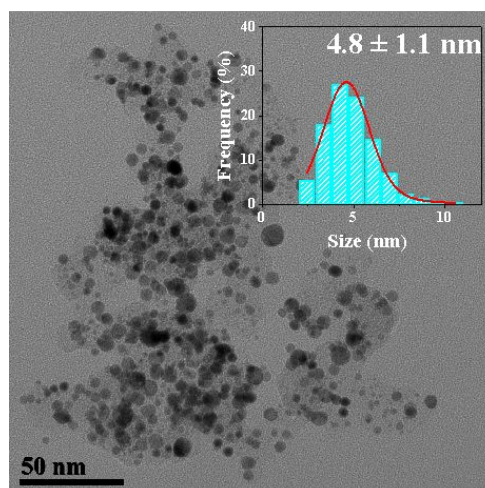

Figure S3. TEM and particle size distribution (inset) of HT-Pt/C

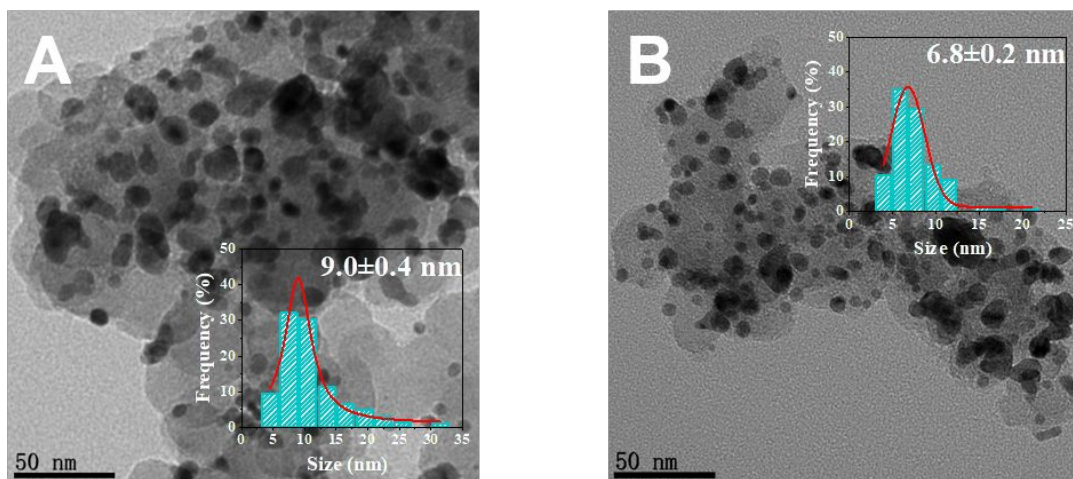

Figure S4. TEM image and particle size distribution (inset) after ADT of PtNi/C (A) and A-PtNi/C (B)

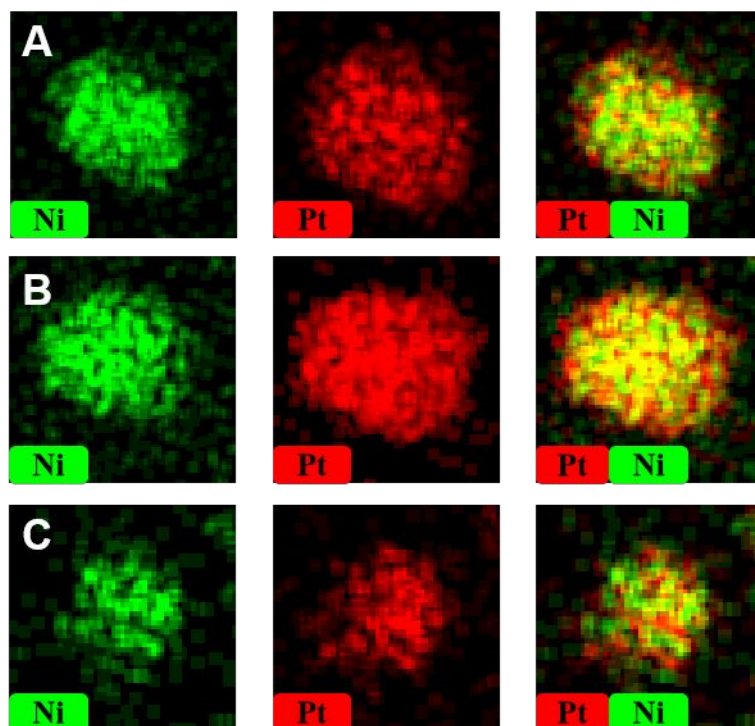

Figure S5. STEM-EDS mappings of PtNi/C before (A) and after 30K cycles (B) and A-PtNi/C catalysts after 30K cycles (C).
